# Supplementary material for: Computational Insights into the Role of Cholesterol in Inverted Hexagonal Phase Stabilization and Endosomal Drug Release
Source: PubMed Central journal article supplement — Langmuir. 2022 Jun 8;38(24):7462–71. doi: 10.1021/acs.langmuir.2c00430 (PMC9220946; doi:10.1021/acs.langmuir.2c00430), 2022-06-08
Supplement: la2c00430_si_001.pdf [file la2c00430_si_001.pdf]

## **Supplementary Information**

### **Computational Insights into the Role of Cholesterol in Inverted Hexagonal Phase Stabilization and Endosomal Drug Release**

Mohsen Ramezanzpour and D. Peter Tieleman

Centre for Molecular Simulation, Department of Biological Sciences, University of Calgary, Calgary,

AB T2N 1N4, Canada

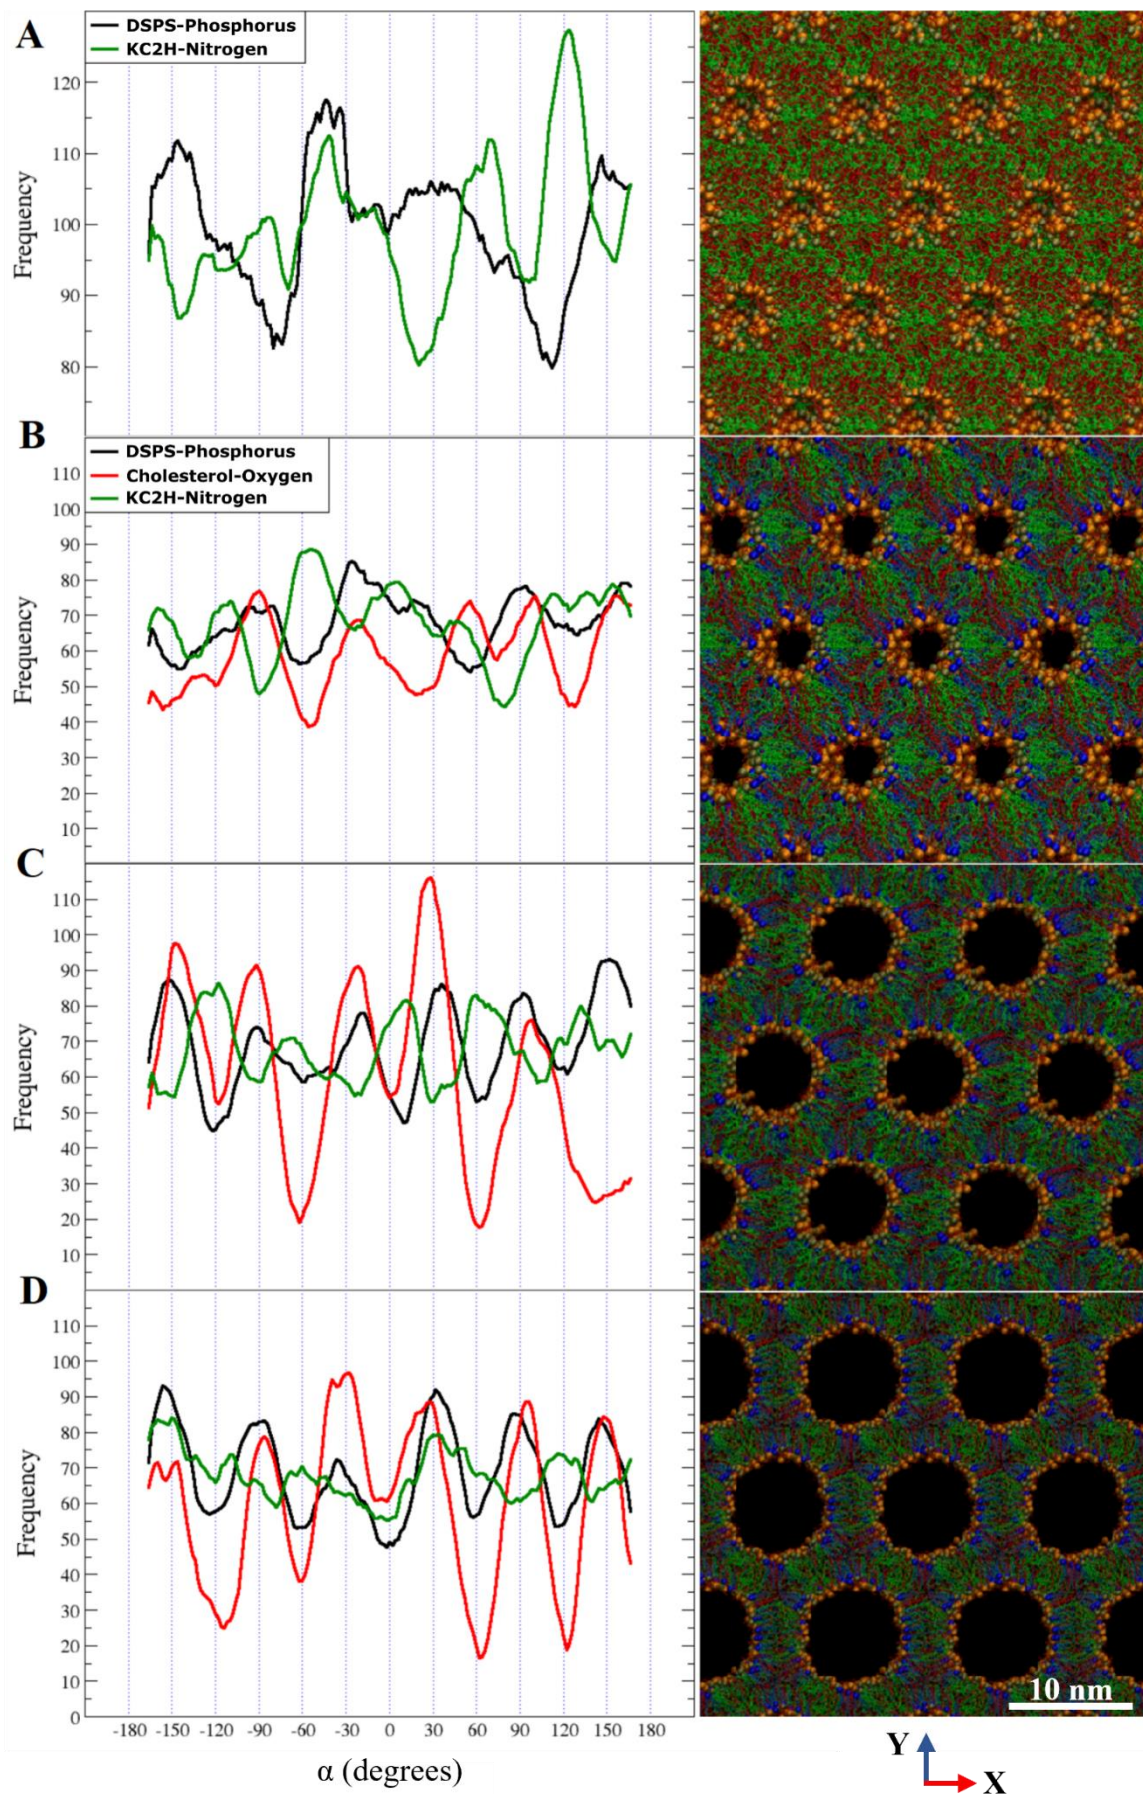



### Figure S1. Lipid angular distribution around the water core

The angular distributions of each lipid type in DSPS/KC2H/cholesterol systems at 313 K are shown in the left column. These correspond to the same systems with (50/50/0) mixing ratio with 10  $n_w$  (A), and (35/35/30) system with 10  $n_w$  (B), 20  $n_w$  (C), and 30  $n_w$  (D). Black, red, and green lines are running averages over histograms of DSPS, cholesterol, and KC2H. The Y axis shows the frequency for a lipid of certain type to be found in a certain angle. Snapshots for the corresponding systems are shown in the right column. The horizontal white bar shows the scale, is the same for all the figures on the right column and can be used for comparison. The lipid tubules point in and out of the page along the Z direction. Water and hydrogens are not shown for clarity. The color code for snapshots is the same as in **Figure 1B** and **Figure 2**.

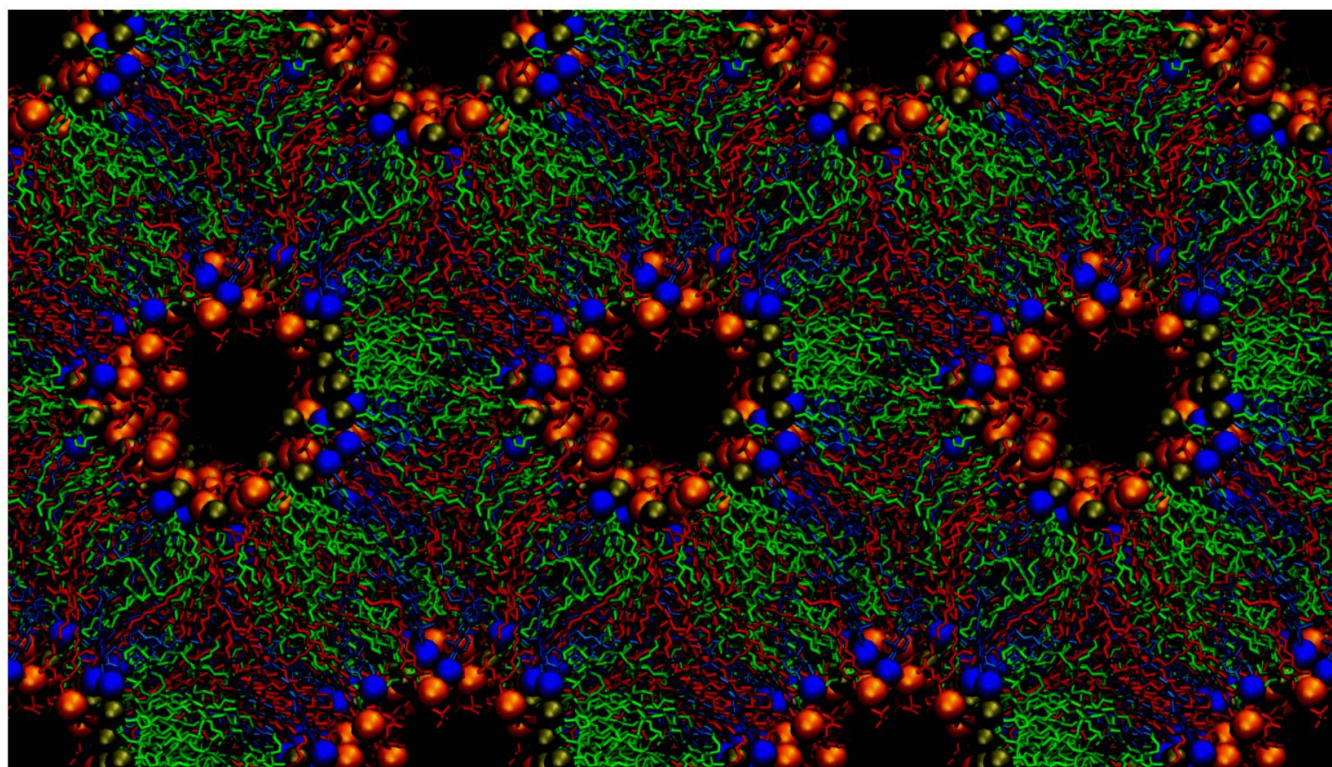

### Figure S2. Lipid angular distribution for DSPS/KC2H/cholesterol at 10 $n_w$

A snapshot at 300 ns of the DSPS/KC2H/cholesterol (35/35/30) system with 10  $n_w$  at 313 K. The color code and definitions are the same as in **Figure 1B** and **Figure 2**.

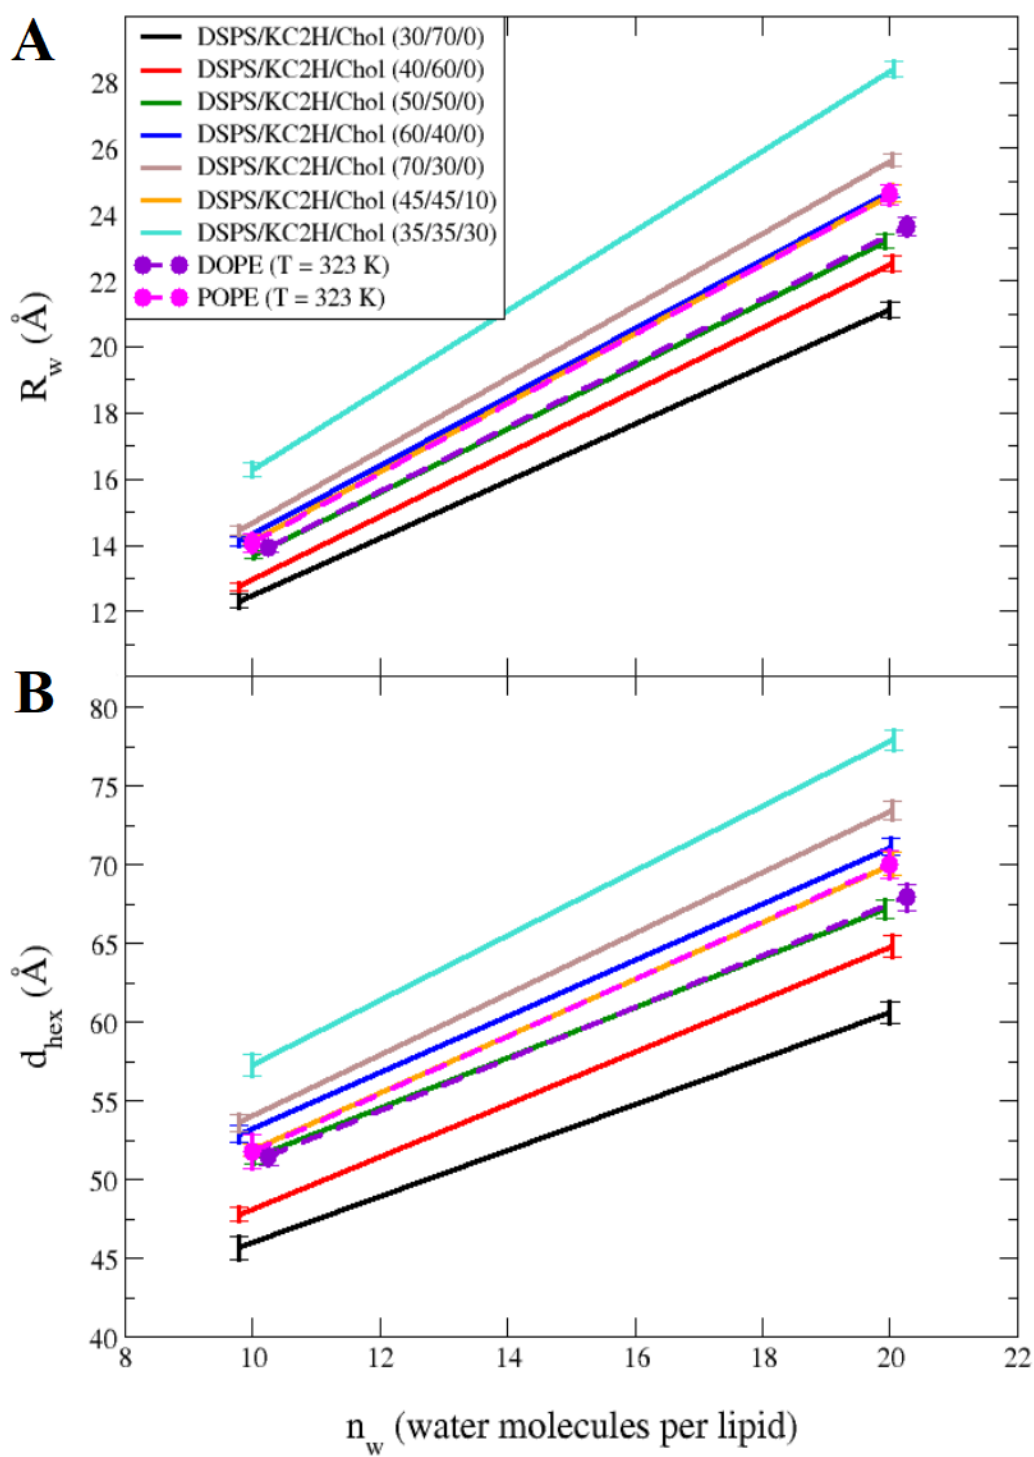

Figure S3. Structural parameters of DSPS/KC2H/cholesterol *versus* PE H<sub>II</sub> systems

**A)** Radius of water core ( $R_w$ ), and **B)** lattice distance ( $d_{\text{hex}}$ ) of DSPS/KC2H/cholesterol H<sub>II</sub> systems with different mixing ratios at 313 K are plotted versus hydration level ( $n_w$ ). Calculated parameters for two hydration levels ( $10 n_w$  and  $20 n_w$ ) are shown and connected with a line (it is well supported and documented in Ramezanzpour et al. (1) that both  $d_{\text{hex}}$  and  $R_w$  are linearly dependent on  $n_w$ . Therefore, for better visualization, only two values corresponding to  $10 n_w$  and  $20 n_w$  hydration levels are shown and connected using a line. Values for  $30 n_w$ , are provided in **Table S1**. Data for DOPE and POPE at 323 K are taken from Ramezanzpour et al. (1) and shown for comparison. The data points are the mean values, and error bars represent the standard deviations of the mean.

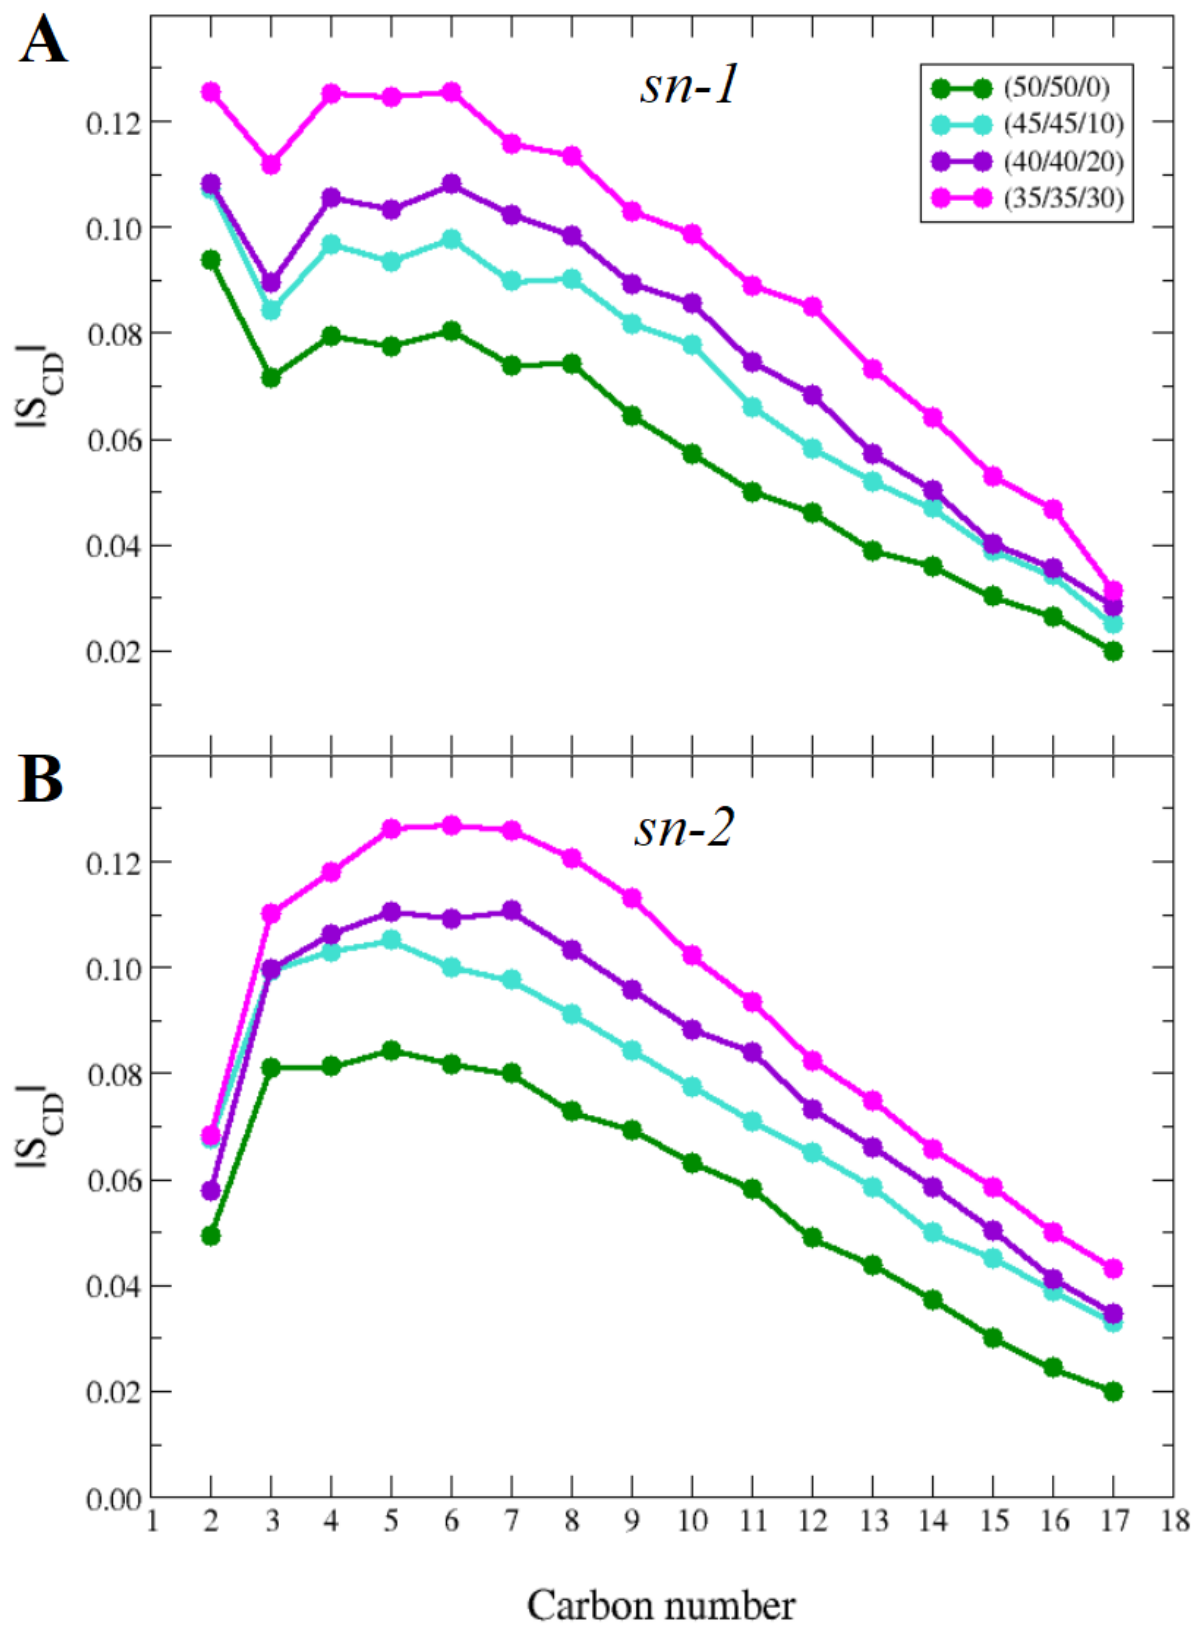

Figure S4.  $S_{CD}$  parameters of DSPS acyl chains in DSPS/KC2H/cholesterol  $H_{II}$  systems

Computational  $S_{CD}$  parameters for **A)** *sn-1*, and **B)** *sn-2* acyl chains of DSPS in DSPS/KC2H/cholesterol  $H_{II}$  system with 10  $n_w$  at 313 K. Only systems with an equimolar concentration of DSPS and KC2H are shown here to highlight the effect of different cholesterol concentration. Systems with a higher concentration of cholesterol had higher  $S_{CD}$  parameters.

## METHODS

### Simulation setup validation

The force field (FF) parameters for these simulations were taken from the CHARMM36 (C36 FF) (See the **METHODS** section in main text for details). These parameters have been shown to be valid for simulation of systems where cholesterol is both minority and majority component in lipid bilayers (2), and for simulation of non-lamellar phases, e.g.,  $H_{II}$  phase (3).

To confirm that the simulated DSPS/KC2H mixtures are valid, we checked whether this system follow the same trends and fulfils the expectations previously reported for  $H_{II}$  phase (1,4,5). MD simulations of DOPE and POPE  $H_{II}$  systems conducted at multiple hydrations but at the same temperature showed that lipids in  $H_{II}$  systems with higher hydrations ( $n_w$ ) have higher  $S_{CD}$  parameters (1). An increase in temperature is also known to decrease the  $S_{CD}$  parameter in  $H_{II}$  phase (4,5). Furthermore, increasing mol% of unsaturated lipids in the mixture is expected to reduce the  $S_{CD}$  in the saturated lipids acyl chains in system (6,7). All these expectations are met for the simulated DSPS/KC2H/cholesterol (50/50/0)  $H_{II}$  systems [**Figure S5**, **Figure S6**].

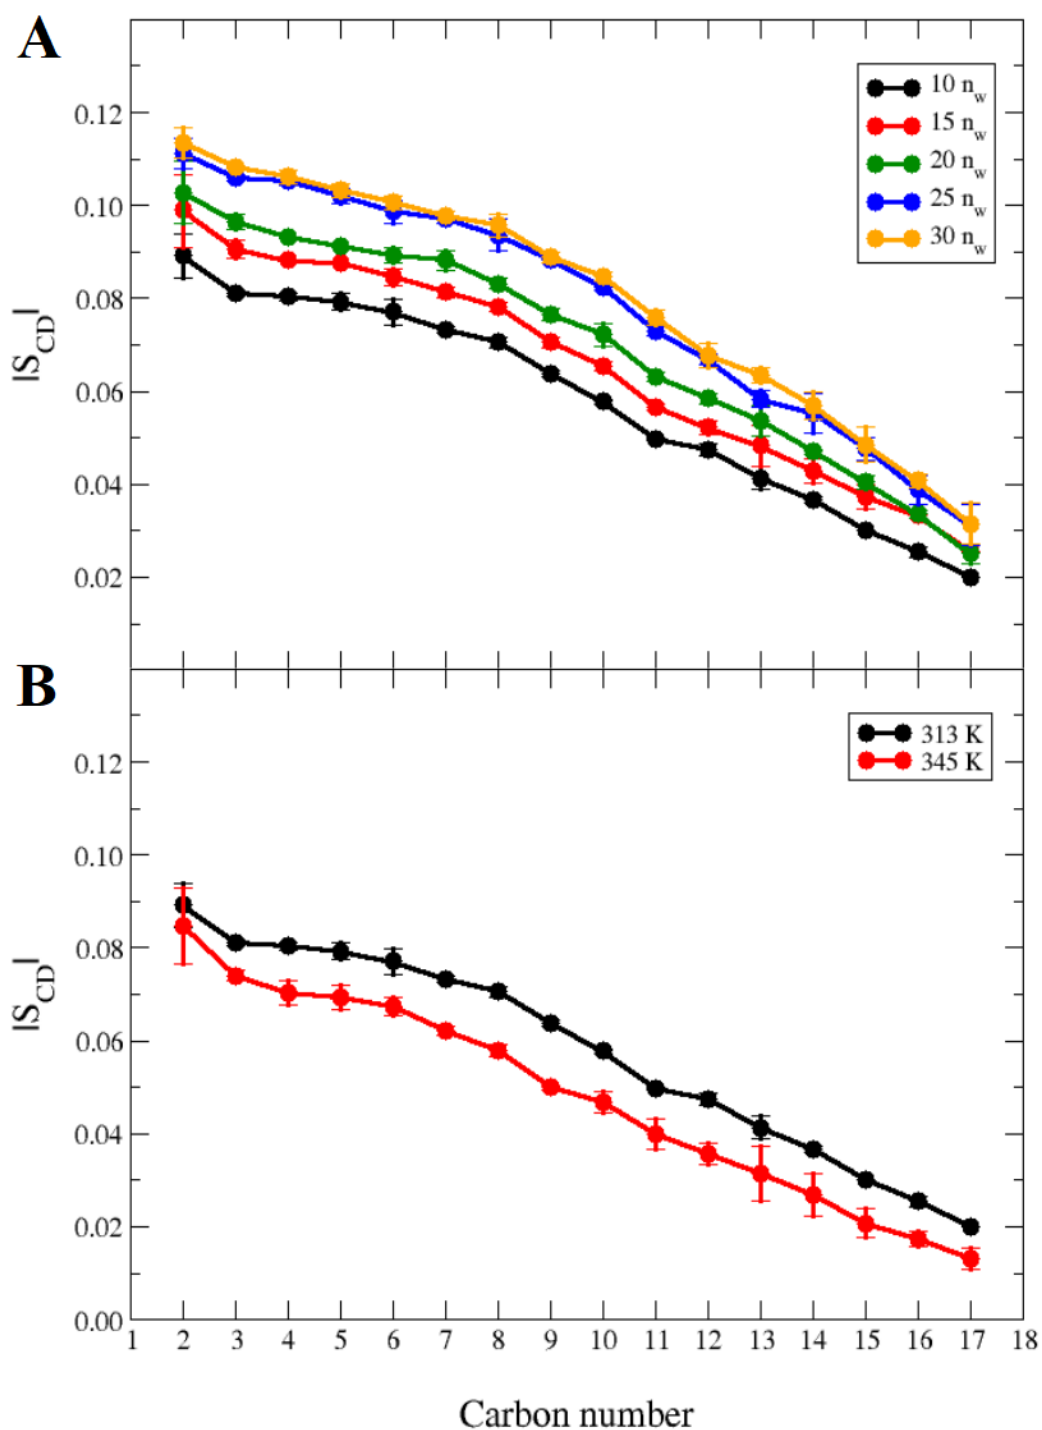

**Figure S5. Effect of hydration level and temperature on DSPS  $S_{CD}$  parameters**

$S_{CD}$  parameters for DSPS lipid in DSPS/KC2H/cholesterol (50/50/0)  $H_{II}$  system sorted in descending order (aka smoothed  $S_{CD}$  parameters). **A**) Effect of hydration level at 313 K. **B**) Effect of temperature for the



system with 15 n<sub>w</sub>. The data points are the average values over both chains, and error bars represent the standard deviation of the mean.

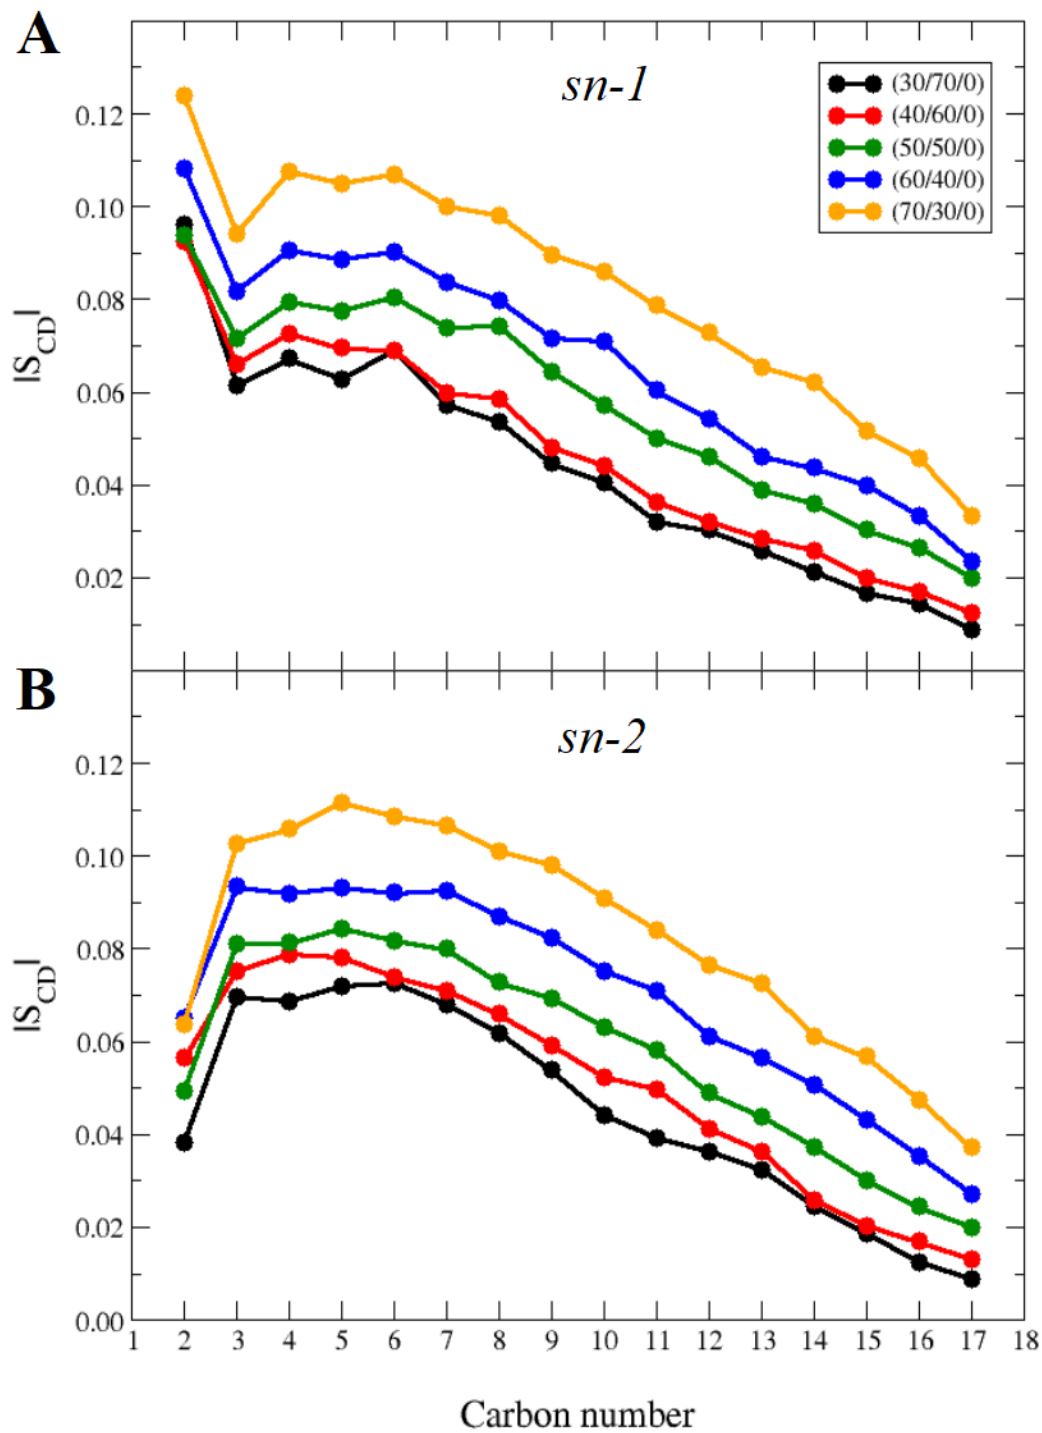

**Figure S6. Effect of mixing ratio on DSPS  $S_{CD}$  parameters**

The  $S_{CD}$  parameters for **A)** *sn-1*, and **B)** *sn-2* acyl chain of DSPS in DSPS/KC2H/cholesterol  $H_{II}$  systems with 10  $n_w$  at 313 K as a function of mixing ratio. The cholesterol concentration is zero and only the DSPS and KC2H molar concentrations is different in the compared systems.

### **Estimation of maximum hydration for DSPS/KC2H/cholesterol (45/45/10) at 310 K**

Both  $^2H$ -NMR and SAXS experiments suggest that the DSPS/KC2H/cholesterol (45/45/10) system form  $H_{II}$  phase at 310K (8). The  $d_{hex}$  value measured using SAXS experiments in the presence of excess water was 53.8 Å at this temperature. This, in addition to three  $d_{hex}$  values (only the computational  $d_{hex}$  values for 10  $n_w$  and 20  $n_w$  are shown and connected by a line) calculated from MD simulations (simulations with the same lipid composition and temperature but with 10, 20, and 30  $n_w$  hydration level) were used to estimate the maximum hydration for this system using ref (1) [**Figure S7-A**]. The maximum hydration is estimated to be about 11.1  $n_w$  at 310 K. Since the  $d_{hex}$  values can be measured with ca. 0.5 angstrom uncertainty (9), the uncertainty in the maximum hydration - estimated from the slope of the diagonal line (1.817), is about 0.3  $n_w$  (1).

To further validate the estimated hydration level, the smoothed  $^2H$ -NMR  $S_{CD}$  parameters for the DSPS stearoyl chains in this system was calculated from the MD simulation of the same system with 10  $n_w$  and was compared with the experimental data available at ref (1) [**Figure S7-B**]. Experimentally, both chains in DSPS lipids were deuterated. Due to the low resolution of  $^2H$ -NMR spectra in the  $H_{II}$  phase, the reported  $S_{CD}$  values for each methylene group are the averaged  $S_{CD}$  over both acyl chains (1). In simulations, the  $S_{CD}$  parameters for this system were also averaged in the same way, sorted descending, and are shown in **Figure S7-B** to compare. The shape, maximum, and minimum  $S_{CD}$  values are in reasonable agreement between simulation and  $^2H$ -NMR. Considering that the hydration level is known to affect the  $S_{CD}$  parameters, this suggests and further supports that our estimated maximum hydration for this system is reasonable.

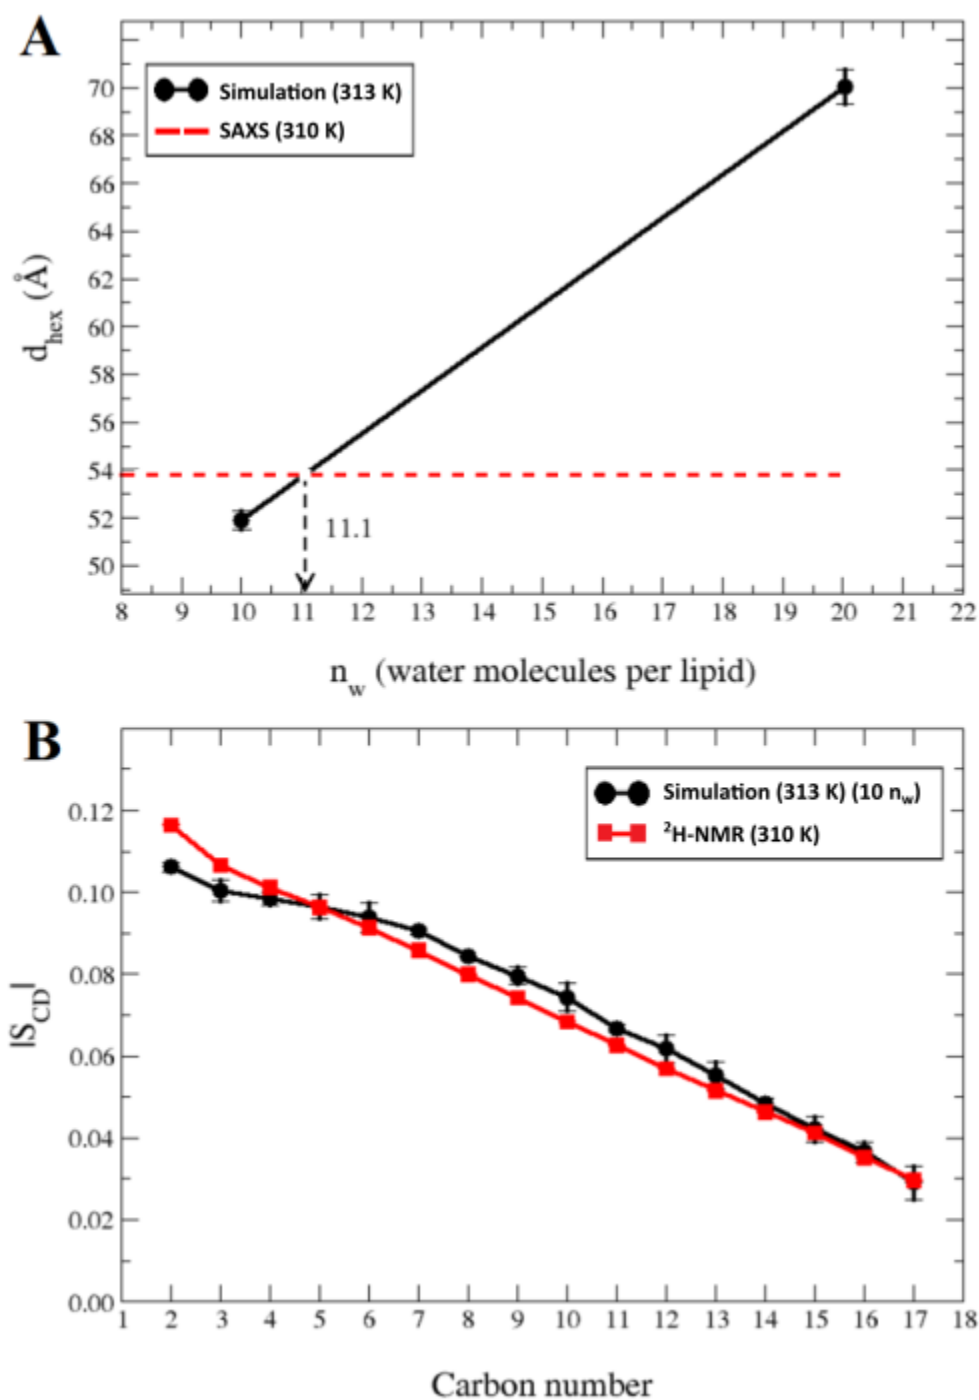

**Figure S7. Maximum hydration for DSPS/KC2H/cholesterol (45/45/10) H<sub>II</sub> system at 310 K**

A) Maximum hydration for DSPS/KC2H/cholesterol (45/45/10) system at 310 K estimated using the hybrid protocol proposed in ref (1) . The solid black line corresponds to the expected  $d_{\text{hex}} - n_w$  line for low hydration levels obtained from two simulations done on the same mixing ratio at 10  $n_w$  and 20  $n_w$  at 313 K. The horizontal dotted line corresponds to the single  $d_{\text{hex}}$  value measured by SAXS in excess water at

310 K (8). **B**) Smoothed averaged S<sub>CD</sub> parameters for DSPS acyl chains measured using <sup>2</sup>H-NMR (310 K) (8) and calculated from MD simulation of system with 10 n<sub>w</sub> and 313 K. Data points are the mean values and error bars represent the standard deviations of means.

## BIBLIOGRAPHY

- [1]. Ramezanpour, M., Schmidt, M., Bashe, B., Pruijm, J., Link, M., Cullis, P., Harper, P., Thewalt, J., & Tieleman, D. (2020). Structural properties of inverted hexagonal phase: A hybrid computational and experimental approach. *Langmuir*, *36*, 6668-6680.
- [2]. Boughter, C. T., Monje-Galvan, V., Im, W., & Klauda, J. B. (2016). Influence of cholesterol on phospholipid bilayer structure and dynamics. *The Journal of Physical Chemistry B*, *120*, 11761-11772.
- [3]. Sodt, A. J., & Pastor, R. W. (2013). Bending free energy from simulation: Correspondence of planar and inverse hexagonal lipid phases. *Biophysical Journal*, *104*, 2202-2211.
- [4]. Lafleur, M., Bloom, M., Eikenberry, E. F., Gruner, S. M., Han, Y., & Cullis, P. R. (1996). Correlation between lipid plane curvature and lipid chain order. *Biophysical Journal*, *70*, 2747-2757.
- [5]. Thurmond, R. L., Lindblom, G., & Brown, M. F. (1993). Curvature, order, and dynamics of lipid hexagonal phases studied by deuterium NMR-spectroscopy. *Biochemistry*, *32*, 5394-5410.
- [6]. Salmon, A., Dodd, S. W., Williams, G. D., Beach, J. M., & Brown, M. F. (1987). Configurational statistics of acyl chains in polyunsaturated lipid bilayers from deuterium NMR. *Journal of the American Chemical Society*, *109*, 2600-2609.
- [7]. Seelig, J., & Waespe-Sarcevic, N. (1978). Molecular order in cis and trans unsaturated phospholipid bilayers. *Biochemistry*, *17*, 3310-3315.

- [8]. Mercer, J. (2018). Investigating a model lipid nanoparticle release system with  $^2\text{H}$  NMR and SAXS (Doctoral dissertation, Science: Department of Physics).
- [9]. Harper, P. E., Mannoek, D. A., Lewis, R., McElhaney, R. N., and Gruner, S. M. (2001). X-ray diffraction structures of some phosphatidylethanolamine lamellar and inverted hexagonal phases. *Biophysical Journal*, 81, 2693-2706.
